# Supplementary material for: Comparative Transcriptome Analysis of CCCH Family in Roles of Flower Opening and Abiotic Stress in Osmanthus fragrans
Source: MDPI journal article supplement (doi:10.3390/ijms232315363), 2022-12-06
Supplement: s1 [file s1]

Table S4 Primers information of *OfCCCH* genes

| Type           | Gene            | Primer sequence (forward/reverse primer)                                                                   | Annealing Temperature (°C) |
|----------------|-----------------|------------------------------------------------------------------------------------------------------------|----------------------------|
| qRT-PCR        | <i>OfACT</i>    | F- CCCAAGGCAAACAGAGAAAAAAT,<br>R- ACCCCATCACCAGAATCAAGAA                                                   | 60.0                       |
|                | <i>OfCCCH6</i>  | F- TTCGGGAGTGCGTGTCTTTT,<br>R- CTTTGAGGCATGCCAATCCG                                                        | 59.5                       |
|                | <i>OfCCCH7</i>  | F- GGTCACATGACTGGACGGAG,<br>R- CCCTTTCTGAAATCCGGGCA                                                        | 58.6                       |
|                | <i>OfCCCH8</i>  | F- TTCATATGTGCCCCGGTGCTT,<br>R- CAGGGCTAACTGGTCCCAAG                                                       | 60.3                       |
|                | <i>OfCCCH17</i> | F- GATCGTGGTCATCGGTCGAG,<br>R- CCCATTGGCATCAACAGCAC                                                        | 61.2                       |
|                | <i>OfCCCH23</i> | F- TCTTTGCTCACTCGACGGAC,<br>R- CAATCGGTGGAGAACCCGAA                                                        | 58.9                       |
|                | <i>OfCCCH25</i> | F- GCCAGTTGTGAAGGCTTGTG,<br>R- GTGGCAACTCTCGCCAAATG                                                        | 60.6                       |
|                | <i>OfCCCH27</i> | F- CTCGGGGGCTAAAGGAACAA,<br>R- CAAATGTGCAATGCTCCCCA                                                        | 60.5                       |
|                | <i>OfCCCH28</i> | F- AGATGTTCCGAACCCGAACC,<br>R- CGAGATCCACTCCACATCCG                                                        | 59.7                       |
|                | <i>OfCCCH32</i> | F- CATGTGGCTCAGATGGGGTT,<br>R- GGCCGAGGCATCGATTAAGA                                                        | 59.7                       |
|                | <i>OfCCCH36</i> | F- GCTGCAGCATTGAGCCTTTT,<br>R- GGGACATGGGCTGGTTGTAT                                                        | 59.6                       |
|                | <i>OfCCCH39</i> | F- GCAGCTGCGTAAGTGGAGTA,<br>R- TGTCCGCTTAAAGCATCCGT                                                        | 60.0                       |
|                | <i>OfCCCH40</i> | F- AAGGGTGACGCGTGTGAATA,<br>R- TTGCATGGCTGCGTACGATA                                                        | 59.4                       |
|                | <i>OfCCCH45</i> | F- TCCCAACAGGAGGTCCTAGC,<br>R- GGTCTGCCGACTGTGGATAC                                                        | 59.5                       |
|                | <i>OfCCCH49</i> | F- GGCTCCGCTCTTTCCCTTTGA,<br>R- TCACATCAACTGGGCGATGA                                                       | 60.5                       |
|                | <i>OfCCCH57</i> | F- CCCACCCATTACATACGGACC,<br>R- AGAGTGTTTCAGCGGAAGGG                                                       | 60.3                       |
|                | <i>OfCCCH62</i> | F- AGAAACGGAAGGGGACGG,<br>R- CACGAGACAACCCCCATCAA                                                          | 60.1                       |
|                | <i>OfCCCH64</i> | F- TTCGGCTGCTTCTAGTCCAG,<br>R- TTGACTCGGGCGTTTGATGA                                                        | 60.8                       |
| pORE R4 vector | <i>OfCCCH8</i>  | F- TTGGGGCCCAACGTTCTCGAGATGGAGTTGTACGGAAGGAGAAGC<br>R- CGAATTCTCCCGGGTGGATCCAACAGGTTGAAAACATCAGATGAACA     | 60.6                       |
|                | <i>OfCCCH23</i> | F- TTGGGGCCCAACGTTCTCGAGATGGGTAGTATTTGTGCTGAACAGC<br>R- CGAATTCTCCCGGGTGGATCCAATTAGGTTAATAGATCATTGACCCACCC | 61.9                       |
|                | <i>OfCCCH27</i> | F- TTGGGGCCCAACGTTCTCGAGATGAGTTCCCTGATCCTGCAC<br>R- CGAATTCTCCCGGGTGGATCCAATATATACTCTTTCCTAGGGGAGTTGTGT    | 60.5                       |
|                | <i>OfCCCH36</i> | F- TTGGGGCCCAACGTTCTCGAGATGTGCAGTGGCCCAGAGAA<br>R- CGAATTCTCCCGGGTGGATCCAAGGAGGAGATGAAGGGATGG              | 60.9                       |
| pGBKT7 vector  | <i>OfCCCH8</i>  | F- ATGGCCATGGAGGCCGAATTCATGGAGTTGTACGGAAGGAGAAGC<br>R- CCGCTGCAGGTCGACGGATCCTTAACAGGTTGAAAACATCAGATGAA     | 61.5                       |
|                | <i>OfCCCH23</i> | F- ATGGCCATGGAGGCCGAATTC ATGGGTAGTATTTGTGCTGAACAGC<br>R- CCGCTGCAGGTCGACGGATCC TTAGGTTAATAGATCATTGACCCACC  | 61.2                       |
|                | <i>OfCCCH27</i> | F- ATGGCCATGGAGGCCGAATTC ATGAGTTTCCCTGATCCTGCAC<br>R- CCGCTGCAGGTCGACGGATCC TCATATATACTCTTTCCTAGGGGAGTTG   | 60.6                       |
|                | <i>OfCCCH36</i> | F- ATGGCCATGGAGGCCGAATTC ATGTGCAGTGGCCCAGAGAA<br>R- CCGCTGCAGGTCGACGGATCC CTAGGAGGGAGATGAAGGGATGG          | 62.1                       |
