# Supplementary material for: Comparative Transcriptome Analysis of CCCH Family in Roles of Flower Opening and Abiotic Stress in Osmanthus fragrans
Source: MDPI journal article supplement (doi:10.3390/ijms232315363), 2022-12-06
Supplement: s1 [file s1]

Table S2 Expression profiles of *OfCCCH* DEGs at S1 and S2 stages of flower opening

| Gene            | FPKM    |          | Log <sub>2</sub> FoldChange | P value                |
|-----------------|---------|----------|-----------------------------|------------------------|
|                 | 0 h     | 120 h    |                             |                        |
| <i>OfCCCH3</i>  | 0.09    | 155.58   | 9.76                        | $1.1 \times 10^{-14}$  |
| <i>OfCCCH6</i>  | 563.67  | 1379.78  | 1.29                        | $3.7 \times 10^{-29}$  |
| <i>OfCCCH7</i>  | 8134.99 | 100.62   | -6.33                       | $1.0 \times 10^{-189}$ |
| <i>OfCCCH16</i> | 7.18    | 60.73    | 3.09                        | $1.8 \times 10^{-10}$  |
| <i>OfCCCH22</i> | 925.09  | 451.49   | -1.04                       | $2.1 \times 10^{-17}$  |
| <i>OfCCCH23</i> | 1302.30 | 112.21   | -3.53                       | $2.0 \times 10^{-105}$ |
| <i>OfCCCH25</i> | 8015.99 | 2695.55  | -1.57                       | $2.3 \times 10^{-69}$  |
| <i>OfCCCH27</i> | 20.36   | 44.67    | 1.13                        | $6.8 \times 10^{-3}$   |
| <i>OfCCCH28</i> | 373.68  | 16.23    | -4.49                       | $2.9 \times 10^{-48}$  |
| <i>OfCCCH35</i> | 339.98  | 108.03   | -1.65                       | $1.9 \times 10^{-10}$  |
| <i>OfCCCH36</i> | 154.18  | 322.65   | 1.06                        | $2.2 \times 10^{-4}$   |
| <i>OfCCCH38</i> | 26.64   | 9.60     | -1.46                       | $7.9 \times 10^{-3}$   |
| <i>OfCCCH40</i> | 2427.85 | 51.47    | -5.57                       | $2.3 \times 10^{-248}$ |
| <i>OfCCCH43</i> | 483.78  | 165.12   | -1.55                       | $4.6 \times 10^{-20}$  |
| <i>OfCCCH49</i> | 772.92  | 11983.74 | 3.96                        | $1.0 \times 10^{-89}$  |
| <i>OfCCCH53</i> | 553.11  | 255.33   | -1.12                       | $1.0 \times 10^{-13}$  |
| <i>OfCCCH55</i> | 388.68  | 170.69   | -1.19                       | $5.7 \times 10^{-12}$  |
| <i>OfCCCH57</i> | 3028.77 | 6458.62  | 1.09                        | $3.8 \times 10^{-32}$  |
| <i>OfCCCH58</i> | 142.91  | 290.19   | 1.02                        | $8.3 \times 10^{-7}$   |
| <i>OfCCCH61</i> | 71.53   | 162.94   | 1.19                        | $2.5 \times 10^{-6}$   |
| <i>OfCCCH63</i> | 1501.08 | 676.35   | -1.15                       | $1.4 \times 10^{-14}$  |
| <i>OfCCCH64</i> | 0.01    | 9.80     | -2.85                       | $7.4 \times 10^{-11}$  |
