# Supplementary material for: Comparative Transcriptome Analysis of CCCH Family in Roles of Flower Opening and Abiotic Stress in Osmanthus fragrans
Source: MDPI journal article supplement (doi:10.3390/ijms232315363), 2022-12-06
Supplement: s1 [file s1]

Table S3 Expression profiles of *OfCCCH* DEGs under different abiotic stresses

| Stress  | Gene            | FPKM  |       | Log <sub>2</sub> FoldChange | P value               |
|---------|-----------------|-------|-------|-----------------------------|-----------------------|
|         |                 | 0 h   | 12 h  |                             |                       |
| ABA     | <i>OfCCCH23</i> | 41.29 | 32.40 | -1.60                       | $4.9 \times 10^{-3}$  |
|         | <i>OfCCCH32</i> | 27.53 | 63.30 | 1.21                        | $3.3 \times 10^{-3}$  |
|         | <i>OfCCCH40</i> | 0.83  | 0.15  | -2.51                       | $4.8 \times 10^{-2}$  |
|         | <i>OfCCCH49</i> | 90.87 | 42.41 | -1.09                       | $5.3 \times 10^{-9}$  |
| Salt    | <i>OfCCCH7</i>  | 4.37  | 10.95 | 1.33                        | $1.4 \times 10^{-6}$  |
|         | <i>OfCCCH23</i> | 9.36  | 32.40 | 1.79                        | $2.2 \times 10^{-23}$ |
|         | <i>OfCCCH32</i> | 27.53 | 63.61 | 1.21                        | $2.5 \times 10^{-9}$  |
|         | <i>OfCCCH49</i> | 90.87 | 31.99 | -1.50                       | $1.2 \times 10^{-39}$ |
|         | <i>OfCCCH64</i> | 0.53  | 0.20  | -1.43                       | $4.3 \times 10^{-2}$  |
| Drought | <i>OfCCCH2</i>  | 13.00 | 4.27  | -1.59                       | $6.5 \times 10^{-10}$ |
|         | <i>OfCCCH8</i>  | 5.22  | 11.46 | 1.12                        | $1.9 \times 10^{-5}$  |
|         | <i>OfCCCH17</i> | 14.18 | 34.83 | 1.38                        | $1.2 \times 10^{-17}$ |
|         | <i>OfCCCH18</i> | 13.72 | 36.96 | 1.26                        | $7.9 \times 10^{-15}$ |
|         | <i>OfCCCH23</i> | 26.64 | 9.60  | -1.46                       | $7.9 \times 10^{-3}$  |
|         | <i>OfCCCH24</i> | 1.58  | 0.51  | -1.63                       | $6.2 \times 10^{-5}$  |
|         | <i>OfCCCH27</i> | 0.36  | 0.12  | -5.72                       | $7.6 \times 10^{-3}$  |
|         | <i>OfCCCH28</i> | 10.95 | 38.69 | 1.80                        | $9.8 \times 10^{-16}$ |
|         | <i>OfCCCH30</i> | 19.42 | 7.19  | -1.42                       | $1.2 \times 10^{-22}$ |
|         | <i>OfCCCH39</i> | 17.76 | 67.56 | 1.72                        | $6.4 \times 10^{-52}$ |
|         | <i>OfCCCH45</i> | 23.57 | 45.98 | 1.07                        | $1.9 \times 10^{-10}$ |
|         | <i>OfCCCH60</i> | 17.83 | 6.74  | -1.39                       | $6.4 \times 10^{-11}$ |
|         | <i>OfCCCH62</i> | 7.19  | 12.78 | 1.15                        | $1.8 \times 10^{-12}$ |
