# Supplementary material for: Comparative Transcriptome Analysis of CCCH Family in Roles of Flower Opening and Abiotic Stress in Osmanthus fragrans
Source: MDPI journal article supplement (doi:10.3390/ijms232315363), 2022-12-06
Supplement: s1 [file s1]

Table S1 Characterization of the predicted *CCCH* proteins in *O. fragrans*

| Gene name | Number of amino acids | Molecular weight (kDa) | PI   | Chr |
|-----------|-----------------------|------------------------|------|-----|
| CCCH1     | 1024                  | 113.94                 | 7.82 | 1   |
| CCCH2     | 388                   | 43.67                  | 6.20 | 1   |
| CCCH3     | 331                   | 37.43                  | 7.95 | 1   |
| CCCH4     | 477                   | 52.26                  | 8.03 | 1   |
| CCCH5     | 785                   | 86.76                  | 6.29 | 1   |
| CCCH6     | 407                   | 45.57                  | 5.71 | 1   |
| CCCH7     | 396                   | 43.87                  | 8.15 | 2   |
| CCCH8     | 406                   | 44.08                  | 8.93 | 3   |
| CCCH9     | 451                   | 49.57                  | 6.02 | 3   |
| CCCH10    | 375                   | 43.02                  | 5.12 | 3   |
| CCCH11    | 742                   | 81.04                  | 6.17 | 3   |
| CCCH12    | 394                   | 42.69                  | 6.31 | 3   |
| CCCH13    | 299                   | 31.69                  | 9.14 | 3   |
| CCCH14    | 799                   | 87.50                  | 5.70 | 3   |
| CCCH15    | 330                   | 31.65                  | 9.37 | 4   |
| CCCH16    | 337                   | 37.12                  | 6.92 | 4   |
| CCCH17    | 667                   | 72.85                  | 6.23 | 5   |
| CCCH18    | 667                   | 72.82                  | 6.23 | 5   |
| CCCH19    | 732                   | 79.42                  | 5.74 | 6   |
| CCCH20    | 345                   | 39.03                  | 8.22 | 6   |
| CCCH21    | 443                   | 48.68                  | 8.56 | 6   |
| CCCH22    | 446                   | 50.91                  | 5.55 | 7   |
| CCCH23    | 320                   | 35.83                  | 9.25 | 7   |
| CCCH24    | 690                   | 75.53                  | 5.63 | 7   |
| CCCH25    | 325                   | 34.24                  | 9.10 | 7   |
| CCCH26    | 767                   | 82.82                  | 4.60 | 7   |
| CCCH27    | 339                   | 38.52                  | 6.47 | 8   |
| CCCH28    | 367                   | 41.10                  | 7.14 | 8   |
| CCCH29    | 788                   | 87.83                  | 8.90 | 9   |
| CCCH30    | 1006                  | 112.43                 | 6.49 | 9   |
| CCCH31    | 287                   | 30.32                  | 9.23 | 9   |
| CCCH32    | 331                   | 36.76                  | 7.07 | 9   |
| CCCH33    | 425                   | 46.35                  | 8.10 | 9   |
| CCCH34    | 331                   | 36.90                  | 7.67 | 9   |
| CCCH35    | 287                   | 31.61                  | 8.84 | 10  |
| CCCH36    | 395                   | 42.53                  | 8.14 | 11  |
| CCCH37    | 147                   | 16.94                  | 9.28 | 11  |
| CCCH38    | 234                   | 25.91                  | 9.47 | 13  |
| CCCH39    | 761                   | 81.79                  | 4.54 | 13  |
| CCCH40    | 364                   | 40.60                  | 8.44 | 13  |
| CCCH41    | 365                   | 40.33                  | 7.61 | 13  |
| CCCH42    | 303                   | 31.80                  | 9.13 | 13  |

|        |      |        |      |    |
|--------|------|--------|------|----|
| CCCH43 | 293  | 30.32  | 9.03 | 14 |
| CCCH44 | 528  | 59.34  | 5.24 | 15 |
| CCCH45 | 433  | 47.86  | 8.42 | 15 |
| CCCH46 | 1195 | 130.48 | 5.13 | 15 |
| CCCH47 | 352  | 38.28  | 6.02 | 16 |
| CCCH48 | 767  | 89.36  | 5.88 | 16 |
| CCCH49 | 663  | 72.09  | 6.40 | 16 |
| CCCH50 | 172  | 19.37  | 7.03 | 16 |
| CCCH51 | 351  | 38.83  | 8.82 | 17 |
| CCCH52 | 502  | 56.37  | 9.05 | 17 |
| CCCH53 | 495  | 52.19  | 8.60 | 17 |
| CCCH54 | 351  | 39.66  | 6.59 | 18 |
| CCCH55 | 736  | 80.88  | 5.72 | 18 |
| CCCH56 | 260  | 29.63  | 9.07 | 18 |
| CCCH57 | 370  | 39.34  | 5.60 | 19 |
| CCCH58 | 349  | 37.38  | 9.08 | 21 |
| CCCH59 | 379  | 41.31  | 8.11 | 21 |
| CCCH60 | 313  | 36.05  | 8.91 | 21 |
| CCCH61 | 324  | 34.71  | 9.12 | 21 |
| CCCH62 | 1008 | 111.89 | 6.30 | 22 |
| CCCH63 | 685  | 76.75  | 6.45 | 23 |
| CCCH64 | 748  | 79.11  | 5.80 | 23 |
| CCCH65 | 695  | 75.90  | 6.12 | 23 |
| CCCH66 | 260  | 29.96  | 9.38 | 23 |
